# Supplementary material for: Desiccation-induced viable but nonculturable state in Pseudomonas putida KT2440, a survival strategy
Source: PLOS journal article supplement (doi:10.1371/journal.pone.0219554), 2019-07-19
Supplement: S1 (10.1371/journal.pone.0219554.s001) [file journal.pone.0219554.s001]

Syto®9

Propidium iodide

Merge

A)

B)

C)

D)

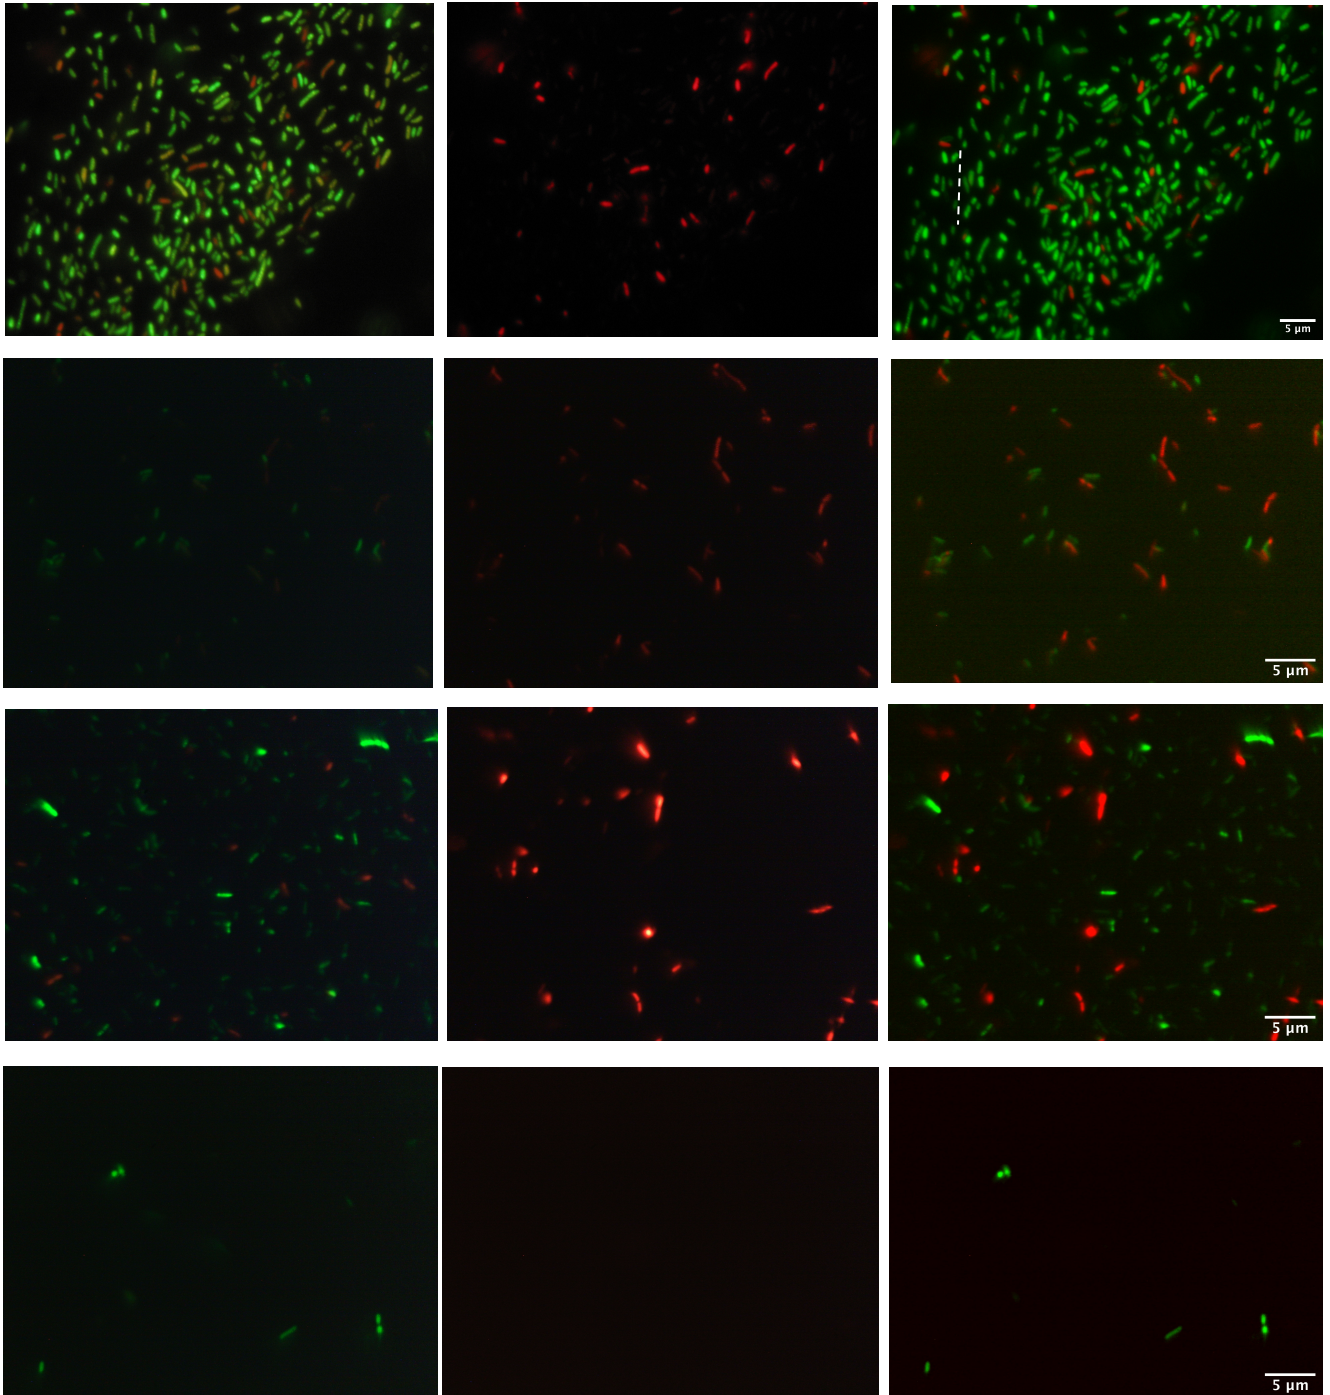

**S1 Fig. Fluorescence microscopy of *P. putida* KT2440 cells treated with the kit “Live/Dead® BacLight™ Bacterial Viability” from treatments desiccated in presence of trehalose (200 mM).**

A) Bacterial cells before desiccation. B) Bacterial cells at 18 DABD. C) Bacterial cell adhered to germinated seeds. D) Rhizosphere colonization of *P. putida* KT2440 from plants inoculated with rehydrated cells of 18 DABD. Each row shows two captured imagens; the images of column SYTO®9 were taken at filter with excitation 420-490 nm, images of column propidium iodide were taken at filter excitation 500-550nm. MERGE correspond to combination of both images (SYTO®9 and propidium iodide).
