# Supplementary material for: Desiccation-induced viable but nonculturable state in Pseudomonas putida KT2440, a survival strategy
Source: PLOS journal article supplement (doi:10.1371/journal.pone.0219554), 2019-07-19
Supplement: S2 (10.1371/journal.pone.0219554.s002) [file journal.pone.0219554.s002]

# Merge

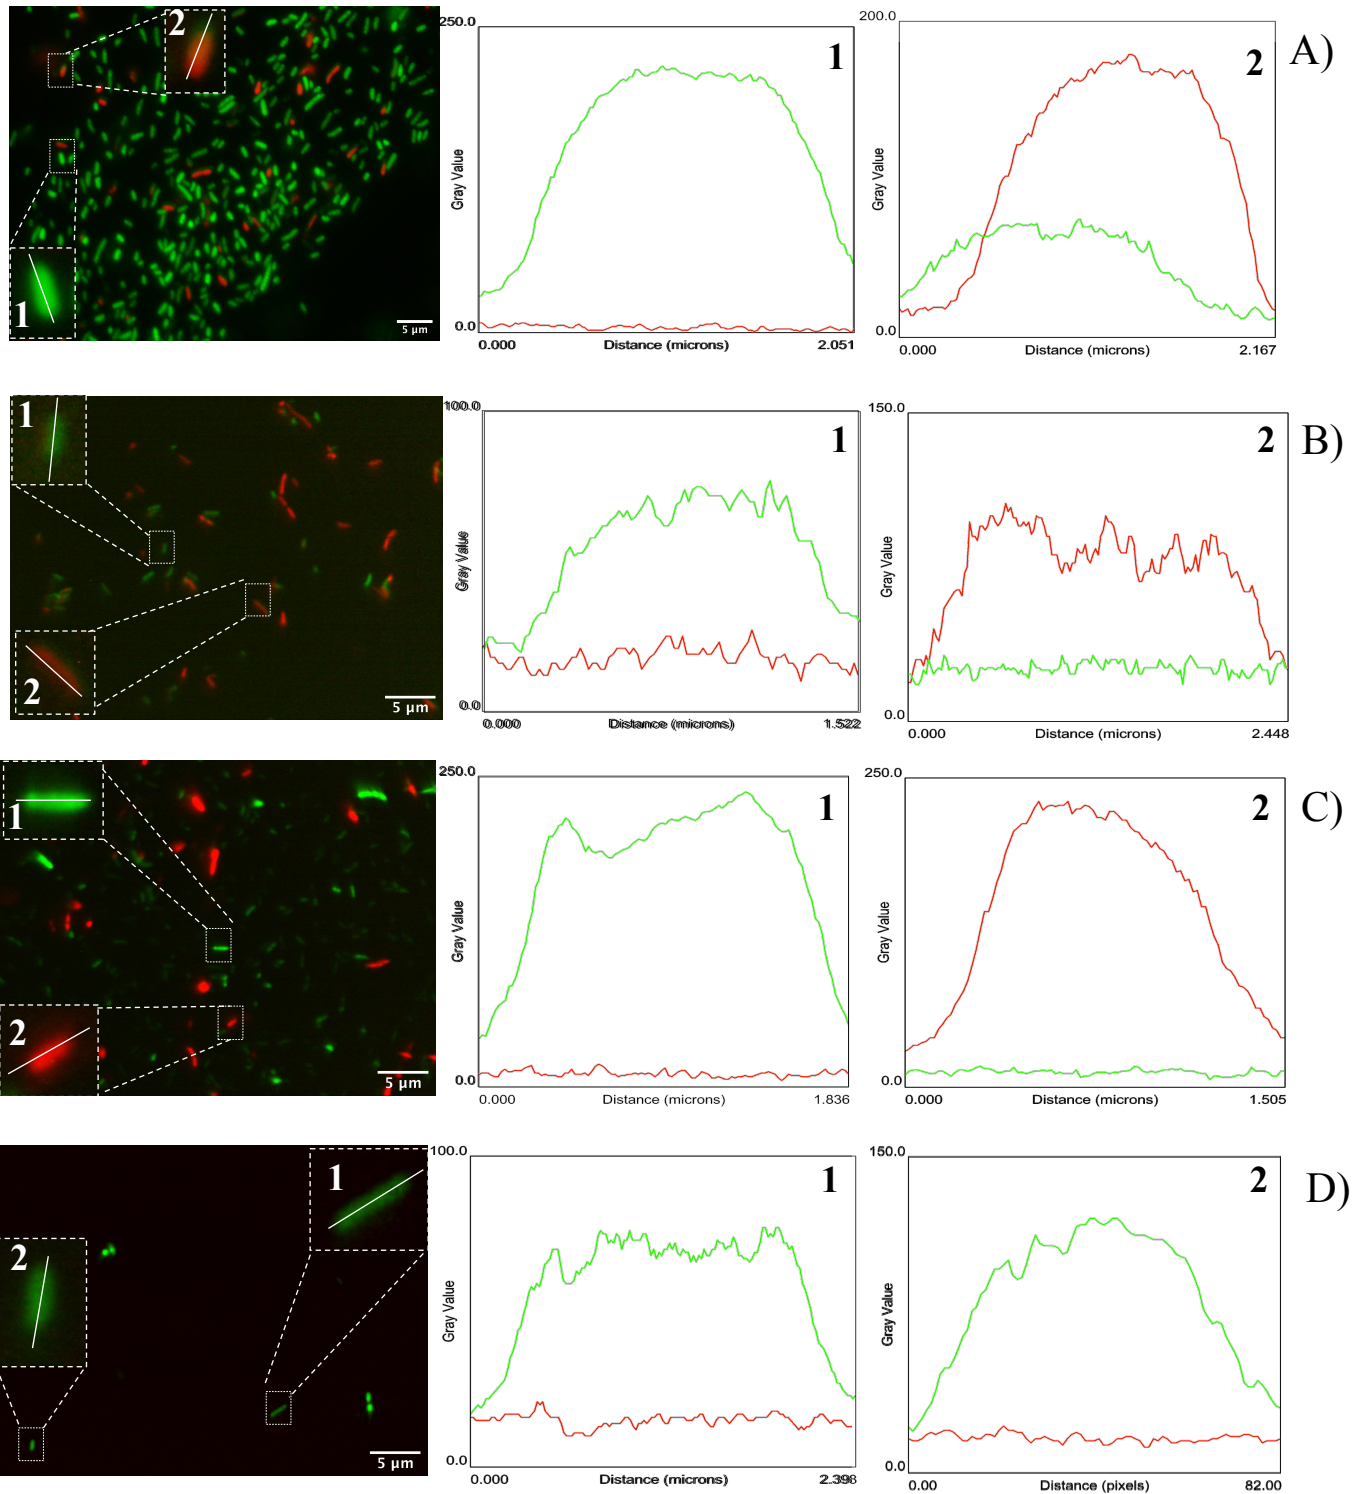

**S2 Fig. MERGE images and histograms that represent distribution of SYTO<sup>®</sup>9 and propidium iodide from cells random selected. Treatments desiccated with trehalose. A) Bacterial cells before desiccation. B) Bacterial cells at 18 DABD. C) Bacterial cell adhered to germinated seeds. D) Rhizosphere colonization of *P. putida* KT2440 from plants inoculated with rehydrated cells of 18 DABD.**
